# Supplementary material for: Effects of an Omega-3 Supplemented, High-Protein Diet in Combination with Vibration and Resistance Exercise on Muscle Power and Inflammation in Old Adults: A Pilot Randomized Controlled Trial
Source: MDPI journal article supplement (doi:10.3390/nu14204274), 2022-10-13
Supplement: s1 [file s1]

**Table S1.** Daily dietary intake, physical activity, home-based exercises, and vibration frequency compared between before (V1) and after (V2) eight weeks of control, high-protein (protein) and high-protein plus omega-3 (omega-3) diet.

|                          | Control ( <i>n</i> = 20) |             | Protein ( <i>n</i> = 20) |                          | Omega-3 ( <i>n</i> = 21) |                           | <i>p</i> -value <sup>†</sup><br>(V1) | <i>p</i> -value <sup>§</sup><br>(Group × time) |
|--------------------------|--------------------------|-------------|--------------------------|--------------------------|--------------------------|---------------------------|--------------------------------------|------------------------------------------------|
|                          | V1                       | V2          | V1                       | V2                       | V1                       | V2                        |                                      |                                                |
| Energy (kcal)            | 1899 ± 339               | 1986 ± 450  | 1966 ± 523               | 2195 ± 433               | 1958 ± 494               | 2028 ± 412                | 0.881                                | 0.336                                          |
| Carbohydrates (En%)      | 37.9 ± 6.1               | 35.8 ± 5.2  | 40.1 ± 6.1               | 34.9 ± 4.8               | 41.6 ± 7.8               | 35.9 ± 4.8                | 0.215                                | 0.144                                          |
| Protein (g/kg bw)        | 0.96 ± 0.19              | 0.97 ± 0.26 | 0.97 ± 0.20              | 1.73 ± 0.27 <sup>a</sup> | 0.93 ± 0.21              | 1.56 ± 0.36 <sup>a</sup>  | 0.809                                | <0.001                                         |
| Leucine (g)              | 5.6 ± 1.3                | 5.8 ± 1.7   | 5.8 ± 2.3                | 11.9 ± 1.7 <sup>a</sup>  | 5.6 ± 1.4                | 10.8 ± 2.3 <sup>a</sup>   | 0.851                                | <0.001                                         |
| Fat (En%)                | 43.3 ± 5.3               | 45.8 ± 4.7  | 40.2 ± 5.8               | 37.3 ± 5.5 <sup>a</sup>  | 39.5 ± 7.2               | 37.2 ± 5.1 <sup>a</sup>   | 0.127                                | 0.036                                          |
| Omega-6 (g)              | 9.8 (7.3)                | 12.7 (8.9)  | 10.3 (4.9)               | 10.7 (8.0)               | 8.5 (5.5)                | 11.2 (5.5)                | 0.482                                | 0.886                                          |
| Omega-3 (g)              | 3.1 (2.1)                | 3.2 (3.4)   | 2.4 (3.7)                | 3.0 (3.2)                | 2.7 (2.1)                | 5.0 (2.8)                 | 0.371                                | 0.008                                          |
| EPA (mg)                 | 185 (503)                | 195 (395)   | 65 (165)                 | 80 (258)                 | 80 (250)                 | 830 (370) <sup>a,b</sup>  | 0.512                                | <0.001                                         |
| DHA (mg)                 | 235 (565)                | 245 (453)   | 145 (260)                | 215 (375)                | 150 (260)                | 1570 (385) <sup>a,b</sup> | 0.309                                | <0.001                                         |
| Sedentary activity (min) | 7539 ± 634               | 6966 ± 1077 | 7477 ± 674               | 7195 ± 910               | 7633 ± 730               | 7477 ± 755                | 0.764                                | 0.170                                          |
| Light activity (min)     | 2123 ± 677               | 1777 ± 614  | 2266 ± 578               | 2098 ± 665               | 2196 ± 621               | 1958 ± 531                | 0.772                                | 0.246                                          |
| Moderate activity (min)  | 197 ± 126                | 168 ± 133   | 171 ± 139                | 155 ± 132                | 165 ± 127                | 172 ± 117                 | 0.720                                | 0.461                                          |
| Vigorous activity (min)  | 0 (0)                    | 0 (0)       | 0 (1)                    | 0 (1)                    | 0 (2)                    | 0 (4)                     | 0.211                                | 0.914                                          |
| Cross crunches (n)       | 30 (26)                  | 44 (27)     | 30 (38)                  | 44 (39)                  | 40 (70)                  | 54 (65)                   | 0.433                                | 0.394                                          |
| Marching (n)             | 40 (20)                  | 52 (20)     | 50 (43)                  | 61 (40)                  | 40 (70)                  | 54 (60)                   | 0.694                                | 0.303                                          |
| Squats (n)               | 18 (9)                   | 31 (8)      | 18 (10)                  | 29 (10)                  | 20 (15)                  | 34 (17)                   | 0.636                                | 0.893                                          |
| Chair rises (n)          | 15 (11)                  | 29 (10)     | 20 (16)                  | 34 (23)                  | 20 (13)                  | 34 (15)                   | 0.190                                | 0.639                                          |
| Chair dips (n)           | 16 (10)                  | 24 (8)      | 15 (10)                  | 29 (9)                   | 20 (10)                  | 30 (16)                   | 0.203                                | 0.080                                          |
| Vibration frequency (Hz) | 20.0 (4.5)               | 33 (0)      | 20.5 (3.4)               | 33 (0)                   | 20.0 (5.5)               | 33 (0)                    | 0.922                                | 0.828                                          |

Values presented as mean ± standard deviation or median (interquartile range). <sup>†</sup> Group comparison at baseline (V1) with analysis of variance (ANOVA) or Kruskal-Wallis test. <sup>§</sup> Group comparison over time with repeated measures ANOVA. <sup>a</sup> Significantly different to control group. <sup>b</sup> Significantly different to protein group. bw body weight; DHA docosahexaenoic acid; En% energy percent; EPA eicosapentaenoic acid.

**Table S2.** Baseline values and effects of eight weeks of high-protein (protein) or high-protein plus omega-3 (omega-3) diet in comparison to control on muscle parameters, body composition and biomarkers displayed for female participants.

| W O M E N                           |                             | Baseline values             |                             |                              | Mixed-models with interaction effects <sup>#</sup> |                 |                                          |                 |                                                    |                 |
|-------------------------------------|-----------------------------|-----------------------------|-----------------------------|------------------------------|----------------------------------------------------|-----------------|------------------------------------------|-----------------|----------------------------------------------------|-----------------|
|                                     | Control<br>( <i>n</i> = 10) | Protein<br>( <i>n</i> = 11) | Omega-3<br>( <i>n</i> = 11) |                              | Protein effects<br>(Protein vs Control)            |                 | Combined effects<br>(Omega-3 vs Control) |                 | Omega-3 additional effects<br>(Omega-3 vs Protein) |                 |
| Outcome variable                    |                             |                             |                             | <i>p</i> -value <sup>†</sup> | β (SE)                                             | <i>p</i> -value | β (SE)                                   | <i>p</i> -value | β (SE)                                             | <i>p</i> -value |
| Muscle power (watt/m <sup>2</sup> ) | 232 (45)                    | 264 (100)                   | 252 (84)                    | 0.629                        | −6.272 (15.355)                                    | 0.685           | 3.661 (15.499)                           | 0.814           | 5.051 (11.307)                                     | 0.657           |
| CRT-time (s)                        | 5.52 (2.33)                 | 4.74 (1.34)                 | 4.84 (0.65)                 | 0.410                        | −0.395 (0.441)                                     | 0.374           | −0.390 (0.496)                           | 0.435           | 0.190 (0.364)                                      | 0.604           |
| Leg strength (kg/m <sup>2</sup> )   | 18.4 (6.5)                  | 20.8 (8.1)                  | 20.1 (7.2)                  | 0.346                        | 1.271 (1.612)                                      | 0.434           | 1.592 (1.292)                            | 0.223           | −1.141 (1.391)                                     | 0.416           |
| FFMI (kg/m <sup>2</sup> )           | 16.0 (1.2)                  | 17.6 (2.2)                  | 16.5 (1.5)                  | 0.164                        | 0.570 (0.272)                                      | 0.041           | 0.631 (0.326)                            | 0.058           | 0.034 (0.371)                                      | 0.927           |
| IL-6 (pg/mL)                        | 2.97 (1.55)                 | 2.09 (1.28)                 | 2.86 (2.07)                 | 0.212                        | 0.043 (0.053)                                      | 0.426           | 0.015 (0.049)                            | 0.759           | −0.014 (0.038)                                     | 0.710           |
| IL-10 (pg/mL)                       | 7.73 (5.59)                 | 7.86 (3.44)                 | 7.66 (4.24)                 | 0.855                        | −0.048 (0.038)                                     | 0.207           | −0.058 (0.022)                           | 0.010           | −0.007 (0.026)                                     | 0.776           |
| IL-6/IL-10 ratio                    | 0.46 ± 0.30                 | 0.29 ± 0.13                 | 0.36 ± 0.16                 | 0.165                        | 0.093 (0.055)                                      | 0.093           | 0.069 (0.048)                            | 0.158           | −0.007 (0.038)                                     | 0.851           |
| HMGB-1 (ng/mL)                      | 0.50 (1.13)                 | 0.20 (0.55)                 | 0.13 (0.53)                 | 0.170                        | 0.276 (0.230)                                      | 0.236           | 0.079 (0.169)                            | 0.642           | −0.152 (0.129)                                     | 0.242           |
| IGF-1 (ng/mL)                       | 175.9 (37.0)                | 201.7 (67.9)                | 219.2 (89.6)                | 0.096                        | 0.011 (0.035)                                      | 0.751           | 0.049 (0.031)                            | 0.112           | 0.046 (0.036)                                      | 0.211           |
| IGFBP-3 (mg/mL)                     | 3.89 (1.97)                 | 3.89 (2.26)                 | 3.70 (3.08)                 | 0.757                        | 0.044 (0.052)                                      | 0.405           | 0.079 (0.043)                            | 0.069           | 0.054 (0.040)                                      | 0.178           |
| IGF-1/IGFBP-3 ratio                 | 48.1 ± 16.1                 | 62.5 ± 19.1                 | 55.0 ± 12.5                 | 0.143                        | −0.033 (0.044)                                     | 0.466           | −0.028 (0.049)                           | 0.569           | −0.008 (0.045)                                     | 0.854           |
| Myostatin (ng/mL)                   | 2.74 (3.10)                 | 2.12 (1.01)                 | 2.72 (1.18)                 | 0.502                        | 0.011 (0.042)                                      | 0.797           | 0.044 (0.043)                            | 0.307           | 0.041 (0.031)                                      | 0.194           |

Values at baseline presented as mean ± standard deviation or median (interquartile range). <sup>†</sup> Between-group comparison at baseline with analysis of variance (ANOVA) or Kruskal-Wallis test. <sup>#</sup> *p*-values for the comparison among the groups from baseline to 8 weeks obtained from generalized linear mixed models with random effects on subjects, adjusted for age, sex, and physical activity. Please note: Biomarkers are shown as absolute values at baseline, but have been log-transformed before mixed-model analysis. Data presented as beta-coefficient (β) with (standard error (SE)). CRT chair rise test; FFMI fat-free mass index; HMGB-1 high-mobility group box-1; IGF-1 insulin-like growth factor-1; IGFBP-3 IGF-binding protein-3; IL interleukin.

**Table S3.** Baseline values and effects of eight weeks of high-protein (protein) or high-protein plus omega-3 (omega-3) diet in comparison to control on muscle parameters, body composition and biomarkers displayed for male participants.

| M E N                               | Baseline values     |                            |                     | Mixed-models with interaction effects <sup>#</sup> |                                         |                 |                                          |                 |                                                    |                 |
|-------------------------------------|---------------------|----------------------------|---------------------|----------------------------------------------------|-----------------------------------------|-----------------|------------------------------------------|-----------------|----------------------------------------------------|-----------------|
|                                     | Control<br>(n = 10) | Protein<br>(n = 9)         | Omega-3<br>(n = 10) |                                                    | Protein effects<br>(Protein vs Control) |                 | Combined effects<br>(Omega-3 vs Control) |                 | Omega-3 additional effects<br>(Omega-3 vs Protein) |                 |
| Outcome variable                    |                     |                            |                     | <i>p</i> -value <sup>†</sup>                       | β (SE)                                  | <i>p</i> -value | β (SE)                                   | <i>p</i> -value | β (SE)                                             | <i>p</i> -value |
| Muscle power (watt/m <sup>2</sup> ) | 361 ± 34            | 297 ± 81 <sup>a</sup>      | 341 ± 37            | 0.045                                              | 17.065 (17.223)                         | 0.327           | 28.376 (13.576)                          | 0.042           | 21.606 (10.088)                                    | 0.037           |
| CRT-time (s)                        | 4.54 ± 0.73         | 6.17 ± 1.95 <sup>a,b</sup> | 4.37 ± 0.83         | 0.009                                              | -1.532 (0.543)                          | 0.007           | -0.388 (0.481)                           | 0.424           | 0.689 (0.372)                                      | 0.069           |
| Leg strength (kg/m <sup>2</sup> )   | 25.4 ± 5.3          | 19.5 ± 7.5                 | 24.1 ± 3.1          | 0.078                                              | 4.417 (1.839)                           | 0.020           | 3.064 (2.085)                            | 0.148           | -1.714 (2.085)                                     | 0.415           |
| FFMI (kg/m <sup>2</sup> )           | 19.9 ± 1.3          | 20.6 ± 1.2                 | 20.6 ± 1.1          | 0.314                                              | 0.533 (0.443)                           | 0.235           | 0.501 (0.312)                            | 0.115           | 0.139 (0.281)                                      | 0.623           |
| IL-6 (pg/mL)                        | 2.97 (1.40)         | 3.69 (2.52)                | 3.33 (4.02)         | 0.722                                              | -0.100 (0.064)                          | 0.124           | -0.176 (0.057)                           | 0.003           | -0.085 (0.038)                                     | 0.030           |
| IL-10 (pg/mL)                       | 8.74 (6.79)         | 7.81 (5.17)                | 10.27 (7.24)        | 0.182                                              | 0.024 (0.039)                           | 0.550           | -0.047 (0.039)                           | 0.237           | -0.052 (0.026)                                     | 0.053           |
| IL-6/IL-10-ratio                    | 0.40 ± 0.32         | 0.47 ± 0.20                | 0.37 ± 0.16         | 0.658                                              | -0.125 (0.067)                          | 0.066           | -0.129 (0.062)                           | 0.042           | -0.033 (0.044)                                     | 0.457           |
| HMGB-1 (ng/mL)                      | 0.22 (1.37)         | 0.34 (0.61)                | 0.36 (0.83)         | 0.586                                              | -0.088 (0.162)                          | 0.588           | -0.434 (0.212)                           | 0.046           | -0.315 (0.179)                                     | 0.084           |
| IGF-1 (ng/mL)                       | 238.8 ± 54.7        | 201.4 ± 67.6               | 242.7 ± 64.6        | 0.304                                              | 0.004 (0.054)                           | 0.939           | 0.034 (0.025)                            | 0.184           | 0.028 (0.033)                                      | 0.409           |
| IGFBP-3 (mg/mL)                     | 4.71 (3.79)         | 4.41 (5.38)                | 5.69 (2.50)         | 0.366                                              | 0.000 (0.053)                           | 0.997           | 0.012 (0.053)                            | 0.825           | -0.014 (0.046)                                     | 0.757           |
| IGF-1/IGFBP-3-ratio                 | 46.0 ± 14.8         | 46.4 ± 20.3                | 42.0 ± 12.2         | 0.798                                              | 0.002 (0.078)                           | 0.981           | 0.024 (0.060)                            | 0.689           | 0.042 (0.051)                                      | 0.413           |
| Myostatin (ng/mL)                   | 2.44 ± 0.61         | 3.62 ± 1.83                | 2.96 ± 1.42         | 0.189                                              | -0.078 (0.053)                          | 0.150           | -0.062 (0.053)                           | 0.248           | -0.039 (30.857)                                    | >0.999          |

Values at baseline presented as mean ± standard deviation or median (interquartile range). <sup>†</sup> Between-group comparison at baseline with analysis of variance (ANOVA) or Kruskal-Wallis test. <sup>a</sup> Significantly different to control group. <sup>b</sup> Significantly different to omega-3 group. <sup>#</sup> *p*-values for the comparison among the groups from baseline to 8 weeks obtained from generalized linear mixed models with random effects on subjects, adjusted for age, sex, and physical activity. Please note: Biomarkers are shown as absolute values at baseline, but have been log-transformed before mixed-model analysis. Data presented as beta-coefficient (β) with (standard error). CRT chair rise test; FFMI fat free mass index; HMGB-1 high-mobility group box-1; IGF-1 insulin-like growth factor-1; IGFBP-3 IGF-binding protein-3; IL interleukin.

**Table S4.** Key characteristics compared between female and male participants.

|                                     | <b>Women (<i>n</i> = 32)</b> | <b>Men (<i>n</i> = 29)</b> | <b><i>p</i>-value</b> |
|-------------------------------------|------------------------------|----------------------------|-----------------------|
| Waist/height ratio                  | 0.58 ± 0.05                  | 0.61 ± 0.06                | 0.064                 |
| Muscle power (watt/m <sup>2</sup> ) | 252.2 (79.7)                 | 343.0 (58.6)               | <0.001                |
| Leg strength (kg/m <sup>2</sup> ) * | 19.6 (8.9)                   | 24.2 (5.1)                 | 0.022                 |
| IL-6 (pg/mL)                        | 2.39 (1.07)                  | 3.19 (1.93)                | 0.011                 |
| IL-10 (pg/mL)                       | 7.75 (3.14)                  | 9.43 (4.89)                | 0.038                 |
| IL-6/IL-10 ratio                    | 0.37±0.21                    | 0.41±0.23                  | 0.474                 |

Values presented as mean ± standard deviation or median (interquartile range) and compared using *t*-Test or Mann-Whitney U-Test. \* One male subject excluded due to measurement error. IL inter-leukin.
